# Supplementary material for: Potentiality of Native Ascomycete Strains in Bioremediation of Highly Polychlorinated Biphenyl Contaminated Soils
Source: MDPI journal article supplement (doi:10.3390/microorganisms9030612), 2021-03-16
Supplement: s1 [file s1]

## Supplementary materials

### SM1: Differences between soil types and between PCB congeners

| Variables                 | Df | Sum sq | Mean sq | F value | Pr(>F)                      |
|---------------------------|----|--------|---------|---------|-----------------------------|
| Soil type                 | 1  | 11203  | 11203   | 22.332  | 5.87 x 10 <sup>-5</sup> *** |
| PCB congeners             | 6  | 250838 | 41806   | 83.338  | 2 x 10 <sup>-16</sup> ***   |
| Soil type x PCB congeners | 6  | 8862   | 1477    | 2.944   | 0.0235 *                    |
| Residuals                 | 28 | 14046  | 502     |         |                             |

**SM2.** Enzymatic activities in nmol g<sup>-1</sup> soil h<sup>-1</sup> in bioaugmented mesocosms (A) and in control mesocosms (B) after three months of treatment. The corresponding enzymes are BG :  $\beta$ -1,4-glucosidase, LAP : L-leucine aminopeptidase, NAG :  $\beta$ -1,4-N-acetylglucosaminidase, PHOS : Phosphatases, EEN : sum of NAG and LAP. EEN: extracellular enzymes of hydrolysis of N substrates; EEP: extracellular enzymes of hydrolysis of P substrates. Values are not significantly different (Welch test; p-value >0.05).

#### A

| Enzymes         | Control mesocosms   | Bioaugmented mesocosms | p-value |
|-----------------|---------------------|------------------------|---------|
| BG              | 42.97 $\pm$ 7.16    | 61.37 $\pm$ 7.07       | 0.2097  |
| LAP             | 773.86 $\pm$ 89.06  | 1082.37 $\pm$ 108.56   | 0.15    |
| NAG             | 28.22 $\pm$ 8.67    | 30.01 $\pm$ 2.39       | 0.8838  |
| EEP = PHOS      | 1183.42 $\pm$ 26.29 | 1016.49 $\pm$ 49.13    | 0.09039 |
| EEN = LAP + NAG | 802.08 $\pm$ 97.03  | 1112.38 $\pm$ 110.88   | 0.1619  |

#### B

| Enzymes         | Control mesocosms  | Bioaugmented mesocosms | p-value |
|-----------------|--------------------|------------------------|---------|
| BG              | 54.50 $\pm$ 4.93   | 58.25 $\pm$ 1.06       | 0.6013  |
| LAP             | 315.22 $\pm$ 33.59 | 294.94 $\pm$ 42.52     | 0.7759  |
| NAG             | 25.28 $\pm$ 1.52   | 27.98 $\pm$ 1.01       | 0.3029  |
| EEP = PHOS      | 412.32 $\pm$ 25.74 | 313.54 $\pm$ 19.81     | 0.07208 |
| EEN = LAP + NAG | 340.50 $\pm$ 34.85 | 322.91 $\pm$ 41.64     | 0.8049  |
